# Supplementary material for: Unraveling the In Vivo Protein Corona
Source: MDPI journal article supplement (doi:10.3390/cells10010132), 2021-01-12
Supplement: s1 [file s1]

# Supplementary Information

## 1. Depletion of Macrophages In Vivo

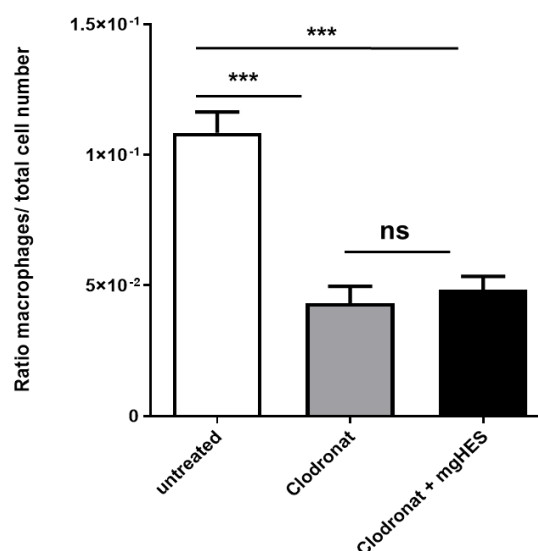

**Figure S1.** Depletion of macrophages in vivo using clodronate-liposomes. The ratio between F480<sup>+</sup> cells (macrophage) and total cell number was calculated. For statistical analysis a two-way ANOVA test was performed. *ns* = not significant,  $p < 0.05^*$   $p < 0.01^{**}$   $p < 0.001^{***}$  ( $n = 12$  for untreated,  $n = 8$  for clodronate treated  $n = 34$  for clodronate + mgHES treated).

## 2. In Vitro Protein Corona Analysis

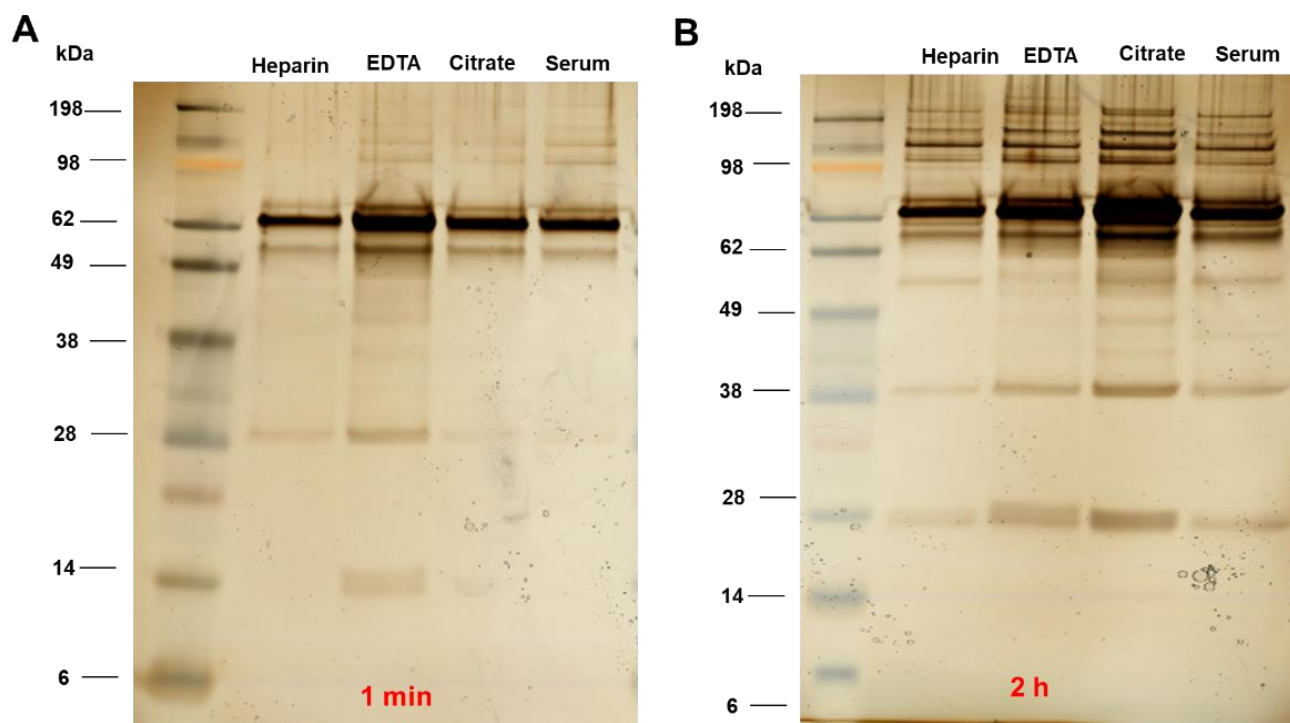

**Figure S2.** mgHES nanoparticles were incubated with plasma or serum for 1 min (A) or 2 h (B). The protein corona was purified via magnetic separation. Proteins were desorbed from the nanoparticle surface and visualized by SDS PAGE.

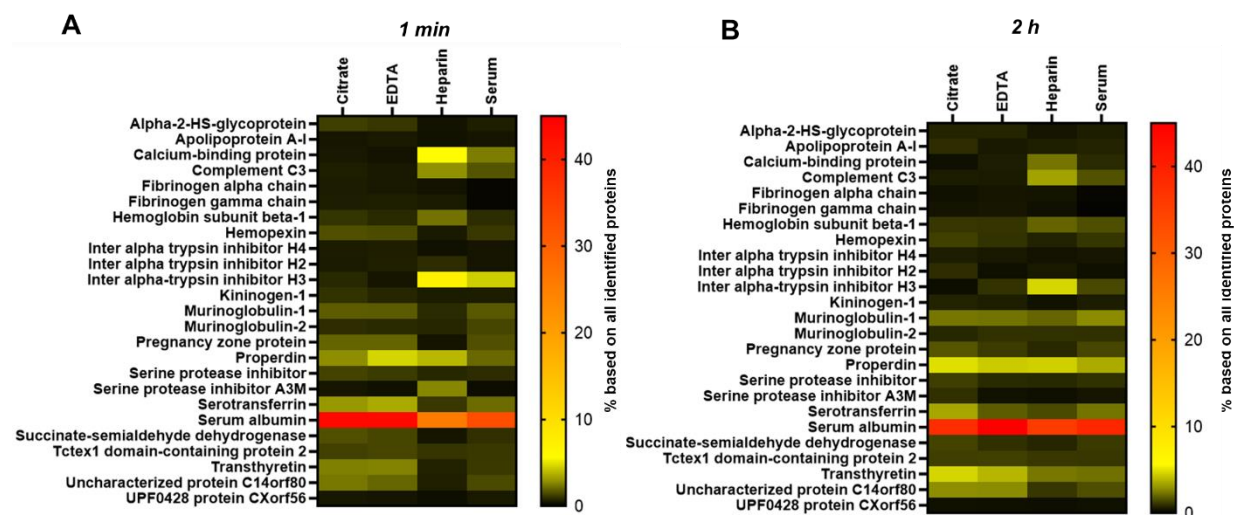

**Figure S3.** Protein corona proteins after 1 min (A) or 2 h (B) in vitro incubation were analysed by LC-MS. The most abundant proteins (25) are summarized in the heat map.

**Table S1.** *p* values for all corona proteins shown in Figure S3. *p* values were determined for each protein source individually and the amount of each corona protein was compared for the two time points (1 min vs. 2 h).

| Citrate                            |    |         | EDTA                               |      |         |
|------------------------------------|----|---------|------------------------------------|------|---------|
|                                    |    | p value |                                    |      | p value |
| Alpha-2-HS-glycoprotein            | *  | 0,0222  | Alpha-2-HS-glycoprotein            | ns   | 0,9983  |
| Apolipoprotein A-I                 | ns | 0,518   | Apolipoprotein A-I                 | ns   | >0,9999 |
| Calcium-binding protein            | ns | 0,2388  | Calcium-binding protein            | ns   | >0,9999 |
| Complement C3                      | ns | 0,9967  | Complement C3                      | ns   | >0,9999 |
| Fibrinogen alpha chain             | ns | 0,199   | Fibrinogen alpha chain             | ns   | >0,9999 |
| Fibrinogen gamma chain             | ns | 0,1127  | Fibrinogen gamma chain             | ns   | >0,9999 |
| Hemoglobin subunit beta-1          | ns | >0,9999 | Hemoglobin subunit beta-1          | ns   | >0,9999 |
| Hemopexin                          | ns | 0,2691  | Hemopexin                          | ns   | 0,8628  |
| Inter alpha trypsin inhibitor H4   | ns | 0,3193  | Inter alpha trypsin inhibitor H4   | ns   | >0,9999 |
| Inter alpha trypsin inhibitor H2   | ns | 0,4597  | Inter alpha trypsin inhibitor H2   | ns   | 0,9993  |
| Inter alpha-trypsin inhibitor H3   | ns | 0,0567  | Inter alpha-trypsin inhibitor H3   | ns   | 0,6826  |
| Kininogen-1                        | *  | 0,0376  | Kininogen-1                        | ns   | >0,9999 |
| Murinoglobulin-1                   | ns | 0,7448  | Murinoglobulin-1                   | ns   | 0,9169  |
| Murinoglobulin-2                   | ns | 0,9708  | Murinoglobulin-2                   | ns   | >0,9999 |
| Pregnancy zone protein             | ns | 0,2949  | Pregnancy zone protein             | ns   | 0,1566  |
| Properdin                          | ns | 0,5112  | Properdin                          | ns   | >0,9999 |
| Serine protease inhibitor A3K      | ns | 0,998   | Serine protease inhibitor A3K      | ns   | 0,9989  |
| Serine protease inhibitor A3M      | *  | 0,0213  | Serine protease inhibitor A3M      | ns   | >0,9999 |
| Serotransferrin                    | ns | 0,1671  | Serotransferrin                    | **** | <0,0001 |
| Serum albumin                      | ** | 0,0063  | Serum albumin                      | ***  | 0,0002  |
| Succinate dehydrogenase            | ns | 0,9814  | Succinate dehydrogenase            | ns   | 0,972   |
| Tctex1 domain-containing protein 2 | ns | >0,9999 | Tctex1 domain-containing protein 2 | ns   | >0,9999 |
| Transthyretin                      | ** | 0,0019  | Transthyretin                      | *    | 0,0215  |
| Uncharacterized protein C14orf80   | ns | 0,2675  | Uncharacterized protein C14orf80   | ns   | 0,293   |
| UPF0428 protein CXorf56            | ns | 0,1032  | UPF0428 protein CXorf56            | ns   | >0,9999 |

| Heparin                            |      | p value | Serum                              |      | p value |
|------------------------------------|------|---------|------------------------------------|------|---------|
| Alpha-2-HS-glycoprotein            | ns   | >0,9999 | Alpha-2-HS-glycoprotein            | ns   | >0,9999 |
| Apolipoprotein A-I                 | ns   | >0,9999 | Apolipoprotein A-I                 | **** | <0,0001 |
| Calcium-binding protein            | ns   | 0,9482  | Calcium-binding protein            | ***  | <0,0001 |
| Complement C3                      | ns   | >0,9999 | Complement C3                      | ns   | 0,9999  |
| Fibrinogen alpha chain             | ns   | >0,9999 | Fibrinogen alpha chain             | ns   | >0,9999 |
| Fibrinogen gamma chain             | ns   | >0,9999 | Fibrinogen gamma chain             | ns   | >0,9999 |
| Hemoglobin subunit beta-1          | ns   | >0,9999 | Hemoglobin subunit beta-1          | **** | <0,0001 |
| Hemopexin                          | ns   | >0,9999 | Hemopexin                          | ns   | 0,9979  |
| Inter alpha trypsin inhibitor H4   | ns   | >0,9999 | Inter alpha trypsin inhibitor H4   | ns   | >0,9999 |
| Inter alpha trypsin inhibitor H2   | ns   | >0,9999 | Inter alpha trypsin inhibitor H2   | ns   | 0,7761  |
| Inter alpha-trypsin inhibitor H3   | ns   | 0,9991  | Inter alpha-trypsin inhibitor H3   | **** | <0,0001 |
| Kininogen-1                        | ns   | >0,9999 | Kininogen-1                        | ns   | >0,9999 |
| Murinoglobulin-1                   | ns   | >0,9999 | Murinoglobulin-1                   | **** | <0,0001 |
| Murinoglobulin-2                   | ns   | >0,9999 | Murinoglobulin-2                   | **** | <0,0001 |
| Pregnancy zone protein             | ns   | >0,9999 | Pregnancy zone protein             | *    | 0,0149  |
| Properdin                          | ns   | >0,9999 | Properdin                          | **** | <0,0001 |
| Serine protease inhibitor A3K      | ns   | >0,9999 | Serine protease inhibitor A3K      | ns   | 0,904   |
| Serine protease inhibitor A3M      | *    | 0,0337  | Serine protease inhibitor A3M      | ns   | 0,0888  |
| Serotransferrin                    | ns   | >0,9999 | Serotransferrin                    | *    | 0,0413  |
| Serum albumin                      | **** | <0,0001 | Serum albumin                      | **** | <0,0001 |
| Succinate dehydrogenase            | ns   | >0,9999 | Succinate dehydrogenase            | **   | 0,0079  |
| Tctex1 domain-containing protein 2 | ns   | >0,9999 | Tctex1 domain-containing protein 2 | ns   | >0,9999 |
| Transthyretin                      | ns   | 0,9975  | Transthyretin                      | **** | <0,0001 |
| Uncharacterized protein C14orf80   | ns   | >0,9999 | Uncharacterized protein C14orf80   | ns   | 0,5481  |
| UPF0428 protein CXorf56            | ns   | >0,9999 | UPF0428 protein CXorf56            | *    | 0,0413  |

### 3. In VIVO Protein corona analysis

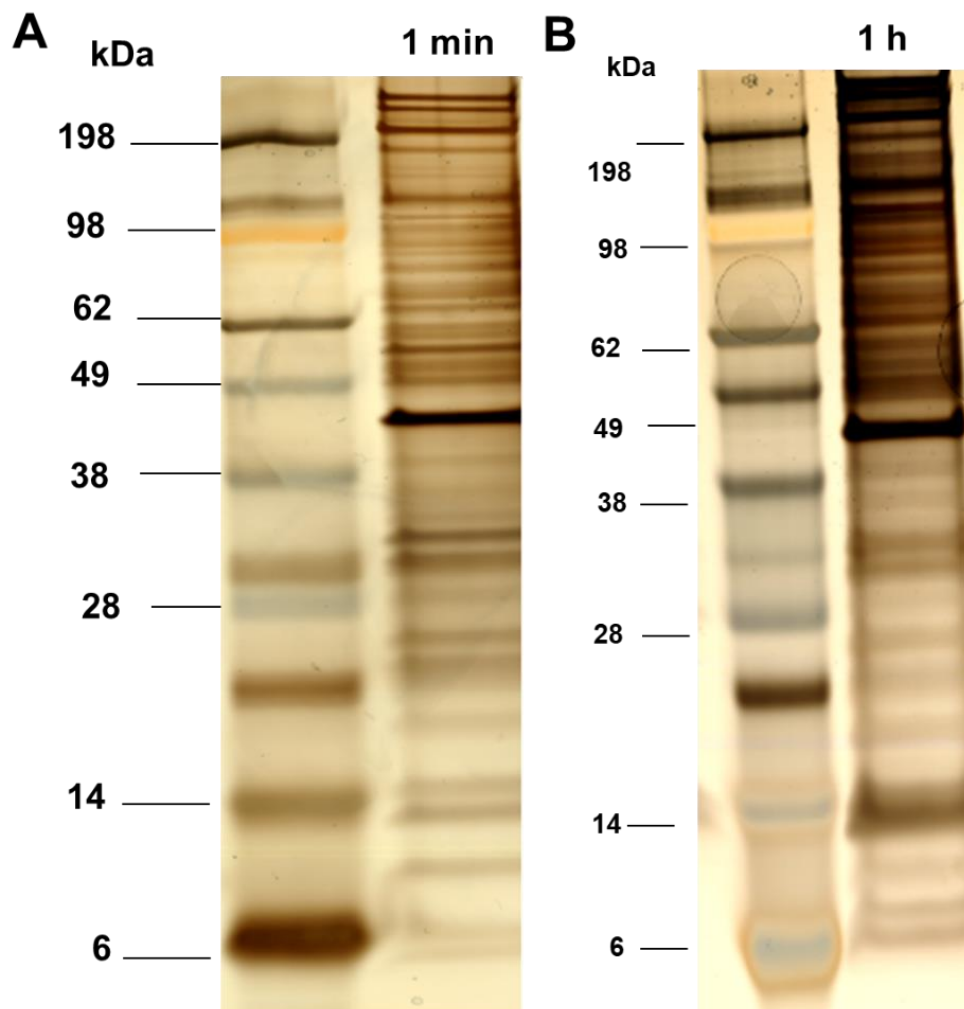

**Figure S4.** mgHES nanoparticles were injected into mice, the blood was isolated after distinct time points (**A** = 1 min, **B** = 1 h) and nanoparticles were recovered via magnetic separation. The protein corona pattern was visualized by SDS-PAGE.

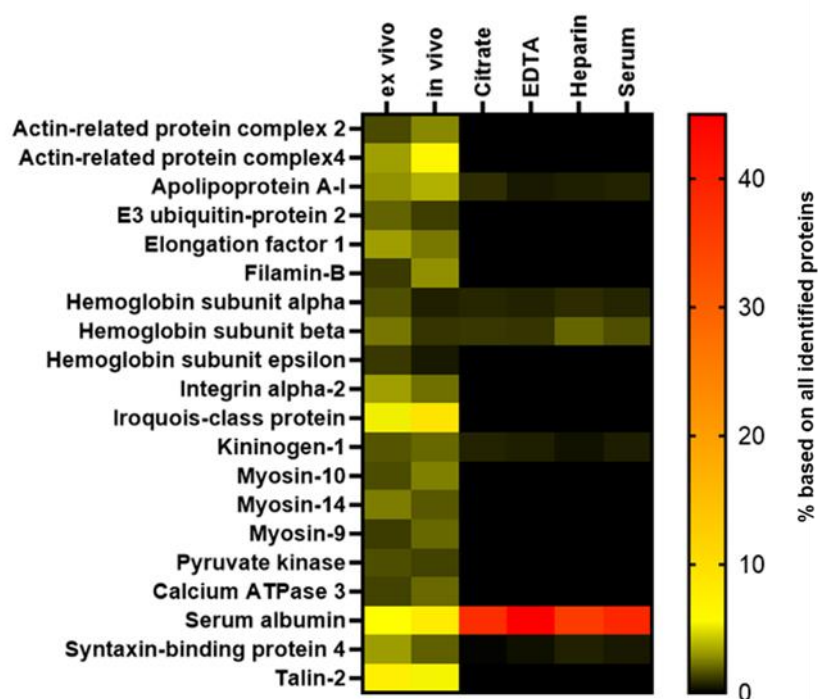

**Figure S5.** To mimic in vivo corona formation, nanoparticles were incubated directly in blood (ex vivo) for 1 min. The heat map of the 20 most abundant corona proteins highlights the similarity between the ex vivo and in vivo corona after 1 min of blood circulation. The average amount of each protein in % is shown and calculated from technical triplicates and biological replicates for ex vivo ( $n = 2$ ) and in vivo ( $n = 5$ ). For comparison nanoparticles were incubated with serum or plasma for 2 h. All identified proteins are summarized in a separate Excel Sheet.
